# Supplementary material for: Permutations in the Factorization of Simplex Bases
Source: Atypon-hosted journal article supplement (doi:10.1287/ijoc.2018.0862), 2019-05-10
Supplement: ijoc.2018.0862.sm1.pdf [file ijoc.2018.0862.sm1.pdf]

# Online Supplement to Permutations in the factorization of simplex bases\*

Ricardo Fukasawa and Laurent Poirrier

September 17, 2018

## 1 Proof of Theorem 1 and Corollary 1

Theorem 1 states that Algorithm 1 yields a pseudo triangular permutation of  $B$  with a nucleus of minimum size. The proof is detailed here.

*Proof of Theorem 1.* We apply Algorithm 1 on  $B$  and obtain the matrix  $B^{(\lambda)}$ . For conciseness, we denote by  $\mathcal{U}$ ,  $\mathcal{L}$  and  $\mathcal{G}$  the index subsets corresponding to the upper triangular, lower triangular, and nucleus parts of  $B^{(\lambda)}$ , respectively:  $\mathcal{U} := \{1, \dots, \kappa\}$ ,  $\mathcal{L} := \{\kappa + 1, \dots, \lambda\}$  and  $\mathcal{G} := \{\lambda + 1, \dots, m\}$ . Let  $B^*$  be a pseudo triangular permutation of  $B$  with a nucleus of minimum size. The sets  $\mathcal{U}^*$ ,  $\mathcal{L}^*$ , and  $\mathcal{G}^*$  are defined for  $B^*$  similarly to their counterparts for  $B$ . Note that, for  $\mathcal{U}^*$  fixed,  $\mathcal{L}^*$  is maximal: there are no singleton-rows in the submatrix formed with rows and columns  $\mathcal{G}^*$  of  $B^*$ . The contrary would immediately contradict the assumption that  $\mathcal{G}^*$  is minimum. Furthermore, we may assume without loss of generality that  $\mathcal{U}^*$  is maximal too: there are no singleton-columns in the submatrix formed with rows and columns  $\mathcal{L}^* \cup \mathcal{G}^*$  of  $B^*$ . Indeed, any such singleton-column can be moved to  $\mathcal{U}^*$  without affecting the size of  $\mathcal{G}^*$ . Algorithm 1 ensures that  $\mathcal{U}$  and  $\mathcal{L}$  are also maximal in the same sense. We then define the functions  $r^*, c^* : \{1, \dots, m\} \rightarrow \{1, \dots, m\}$ , such that the row  $r^*(i)$  of  $B^*$  corresponds to the row  $i$  of  $B$ , and the column  $c^*(j)$  of  $B^*$  corresponds to the column  $j$  of  $B$ . Recall that by Lemma 1, every diagonal element in the triangular blocks of  $B^{(\lambda)}$  and  $B^*$  is nonzero. Thus, in the following, “diagonal” will always imply “nonzero”. The proof works in three steps.

(i) We show that every column in  $\mathcal{L} \cup \mathcal{G}$  maps to a column in  $\mathcal{L}^* \cup \mathcal{G}^*$ , i.e.,  $j \in \mathcal{L} \cup \mathcal{G}$  implies  $c^*(j) \in \mathcal{L}^* \cup \mathcal{G}^*$ . Let  $j_a = \operatorname{argmin}_{j \in \mathcal{L} \cup \mathcal{G}} c^*(j)$ . Suppose that the claim is not true: suppose that there exists  $j \in \mathcal{L} \cup \mathcal{G}$  such that  $c^*(j) \in \mathcal{U}^*$ . Then,  $c^*(j_a) \in \mathcal{U}^*$  (Figure 1). Since  $j_a \in \mathcal{L} \cup \mathcal{G}$  and  $\mathcal{U}$  is maximal, there are at least two nonzero elements in column  $j_a$  of  $B^{(\lambda)}$ . All of them correspond to elements of  $\mathcal{U}^*$ , so at least one lies above the diagonal of  $\mathcal{U}^*$ . Let that element

---

\*Partially supported by NSERC Discovery Grant RGPIN-05623, MRI’s Early Researcher Award ER11-08-174, and NSERC Discovery Grant RGPIN-2018-04335.

be in row  $i_a$  of  $B^{(\lambda)}$ , corresponding to the element of  $B^*$  in row  $r^*(i_a)$  and column  $c^*(j_a)$ , with  $r^*(i_a) < c^*(j_a)$ . The diagonal element in that row of  $\mathcal{U}^*$  is in column  $c^*(j_b) = r^*(i_a)$  for some  $j_b$ . Since it is a nonzero in the row  $i_a$  of  $B^{(\lambda)}$ , we know that  $j_b \in \mathcal{L} \cup \mathcal{G}$ . However, because  $c^*(j_b) = r^*(i_a) < c^*(j_a)$ , this contradicts the construction of  $j_a$  as  $\operatorname{argmin}_{j \in \mathcal{L} \cup \mathcal{G}} c^*(j)$ .

(ii) We can reverse the roles of  $B^{(\lambda)}$  and  $B^*$  in the proof of (i). Therefore, every column in  $\mathcal{L}^* \cup \mathcal{G}^*$  maps to a column in  $\mathcal{L} \cup \mathcal{G}$ , i.e.,  $c^*(j) \in \mathcal{L}^* \cup \mathcal{G}^*$  implies  $j \in \mathcal{L} \cup \mathcal{G}$ . Together, (i) and (ii) prove that  $\mathcal{U}$  is a permutation of  $\mathcal{U}^*$ .

(iii) We transpose the reasoning that led to (i) and (ii) and apply it to the submatrices formed with the columns  $\mathcal{L}^* \cup \mathcal{G}^*$  of  $B^*$  and  $\mathcal{L} \cup \mathcal{G}$  of  $B^{(\lambda)}$  (Figure 2). This yields  $|\mathcal{L}| = |\mathcal{L}^*|$  and hence  $|\mathcal{G}| = |\mathcal{G}^*|$ , completing our proof.  $\square$

Corollary 1 states that Algorithm 1 finds a permutation of the rows and columns of  $B$  that is upper triangular whenever one exists.

*Proof of Corollary 1.* By Theorem 1, Algorithm 1 yields a pseudo triangular matrix  $B^{(m)}$  with no nucleus. Assume that  $\kappa < m$  when the algorithm starts Step 2. Then it means that  $G^{(\kappa)}$  does not contain a column-singleton. However, since the final result  $B^{(m)}$  has no nucleus, there exists a permutation  $L^{(m)}$  of  $G^{(\kappa)}$  that is lower triangular, contradicting the absence of a column-singleton in  $G^{(\kappa)}$ . Hence  $\kappa < m$  is impossible.  $\square$

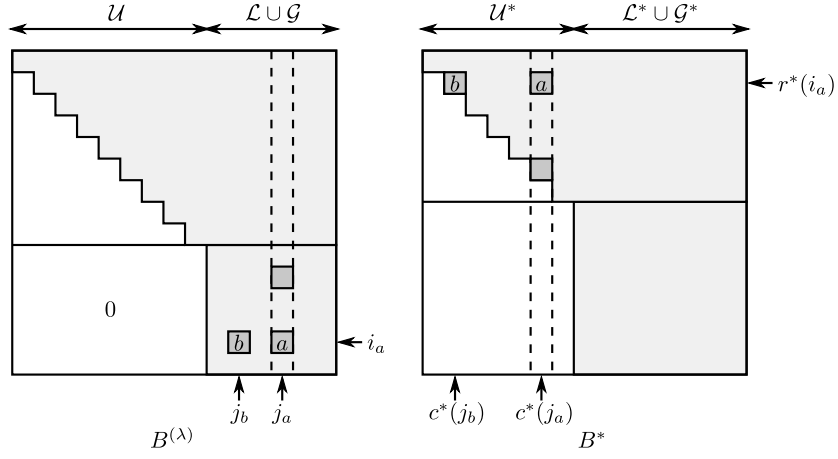

Figure 1: Proof of Theorem 1, step (i).

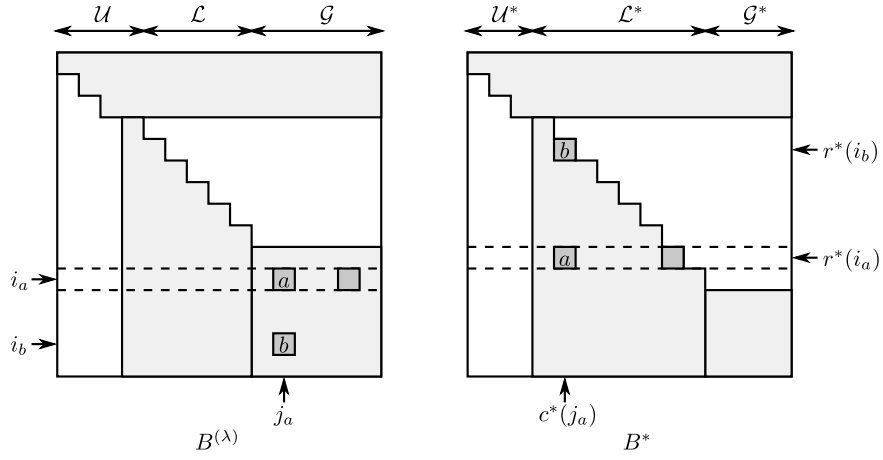

Figure 2: Proof of Theorem 1, step (iii).
